# Supplementary material for: Design of bimetallic magnetic chains based on oxalate complexes: towards single chain magnets
Source: Royal Society of Chemistry journal article supplement (doi:10.1039/b910490a), 2009-01-01

## Supplementary information

### Design of bimetallic magnetic chains based on oxalate complexes: towards single chain magnets

Eugenio Coronado, José R. Galán-Mascarós and Carlos Martí-Gastaldo

#### SI 1. FT-IR spectroscopy.

Infrared spectra were recorded in a FT-IR Nicolet 5700 spectrometer in the 4000-400  $\text{cm}^{-1}$  range using powdered samples diluted in KBr pellets:

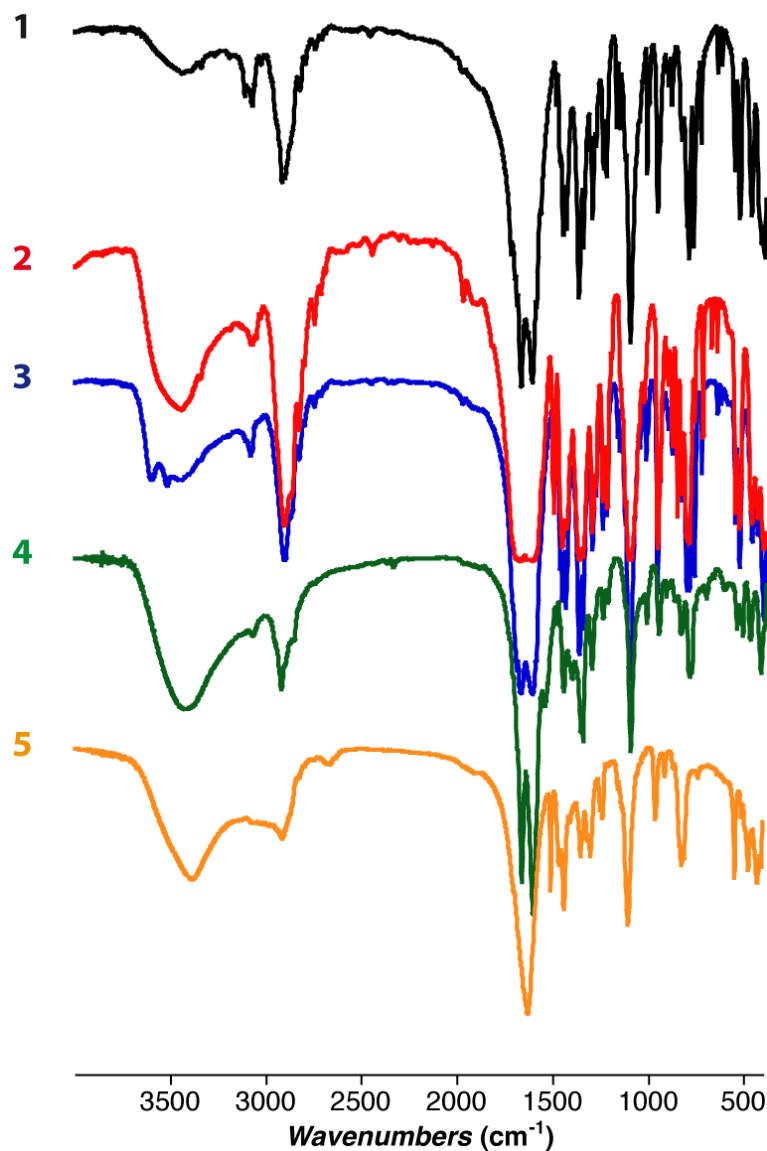

Most characteristic vibration modes for compounds **1-5** were assigned as follows:<sup>1</sup> **1**)  $\nu[\text{C-H}]$ : 2918, 2905, 2826, 1457, 1441  $\text{cm}^{-1}$ ;  $\nu[\text{C=O}]$ : 1728, 1698, 1676, 1617  $\text{cm}^{-1}$ ;  $\nu[\text{C-O}]$ : 1304, 1285, 1248, 1233  $\text{cm}^{-1}$ ;  $\nu[\text{C-O}]$ : 1107  $\text{cm}^{-1}$ ;  $\nu[\text{C-C}]$ : 964, 907  $\text{cm}^{-1}$ ;  $\nu[\text{O-C=O}]$ : 839, 803  $\text{cm}^{-1}$ ;

<sup>1</sup> Socrates, G. *Infrared characteristic group frequencies: tables and charts*; 2<sup>nd</sup> Ed. John Wiley & Sons. West Sussex, UK, 1994.

$\nu[\text{M-O}]$ : 565, 477, 420, 409  $\text{cm}^{-1}$ . **(2)**  $\nu[\text{C-H}]$ : 2903, 2831, 1460, 1444  $\text{cm}^{-1}$ ;  $\nu[\text{C=O}]$ : 1697, 1677, 1616  $\text{cm}^{-1}$ ;  $\nu[\text{C-O}]$ : 1373, 1353, 1304, 1286  $\text{cm}^{-1}$ ;  $\nu[\text{C-O}]$ : 1109  $\text{cm}^{-1}$ ;  $\nu[\text{C-C}]$ : 966, 910  $\text{cm}^{-1}$ ;  $\nu[\text{O-C=O}]$ : 815, 802  $\text{cm}^{-1}$ ;  $\nu[\text{M-O}]$ : 563, 539, 475, 444, 413  $\text{cm}^{-1}$ . **(3)**  $\nu[\text{C-H}]$ : 2906, 2831, 2803, 1462, 1439  $\text{cm}^{-1}$ ;  $\nu[\text{C=O}]$ : 1674, 1612  $\text{cm}^{-1}$ ;  $\nu[\text{C-O}]$ : 1371, 1353, 1306, 1286  $\text{cm}^{-1}$ ;  $\nu[\text{C-O}]$ : 1110  $\text{cm}^{-1}$ ;  $\nu[\text{C-C}]$ : 965, 911  $\text{cm}^{-1}$ ;  $\nu[\text{O-C=O}]$ : 839, 815, 802  $\text{cm}^{-1}$ ;  $\nu[\text{M-O}]$ : 551, 476, 445, 413  $\text{cm}^{-1}$ . **(4)**  $\nu[\text{C-H}]$ : 2921, 1454, 1409  $\text{cm}^{-1}$ ;  $\nu[\text{C=O}]$ : 1673, 1613  $\text{cm}^{-1}$ ;  $\nu[\text{C-O}]$ : 1364, 1354, 1305, 1249  $\text{cm}^{-1}$ ;  $\nu[\text{C-O}]$ : 1106  $\text{cm}^{-1}$ ;  $\nu[\text{C-C}]$ : 959, 910  $\text{cm}^{-1}$ ;  $\nu[\text{O-C=O}]$ : 844  $\text{cm}^{-1}$ ;  $\nu[\text{M-O}]$ : 553, 533, 484, 427  $\text{cm}^{-1}$ . **(5)**  $\nu[\text{C-H}]$ : 2913, 1464, 1438  $\text{cm}^{-1}$ ;  $\nu[\text{C=O}]$ : 1627  $\text{cm}^{-1}$ ;  $\nu[\text{C-O}]$ : 1352, 1300, 1236  $\text{cm}^{-1}$ ;  $\nu[\text{C-O}]$ : 1103  $\text{cm}^{-1}$ ;  $\nu[\text{C-C}]$ : 960, 911  $\text{cm}^{-1}$ ;  $\nu[\text{O-C=O}]$ : 824, 810  $\text{cm}^{-1}$ ;  $\nu[\text{M-O}]$ : 546, 511, 475, 428  $\text{cm}^{-1}$ .

## SI 2. Metallic composition.

Metallic composition of hand collected grounded crystals of **1**, **3**, **4** and **5** together with polycrystalline powder of **4** were estimated by electron probe microanalysis (EPMA). The analysis was performed in a Philips SEM XL30 equipped with an EDAX microprobe. The obtained results are summarized in Table 1.

**Table 1.** Metallic composition of compounds **1-5** expressed as atomic percentage.

| Sample   | %M <sup>II</sup> |      | %M <sup>III</sup> |      | %K     |      |
|----------|------------------|------|-------------------|------|--------|------|
|          | Theor.           | Exp. | Theor.            | Exp. | Theor. | Exp. |
| <b>1</b> | 33.3             | 33.8 | 33.3              | 33.2 | 33.3   | 33.0 |
| <b>2</b> | 33.3             | 34.3 | 33.3              | 32.6 | 33.3   | 33.1 |
| <b>3</b> | 33.3             | 33.5 | 33.3              | 33.0 | 33.3   | 33.5 |
| <b>4</b> | 33.3             | 33.4 | 33.3              | 34.1 | 33.3   | 32.5 |
| <b>5</b> | 40.0             | 41.5 | 40.0              | 39.3 | 20.0   | 19.2 |

**SI 3.** Best fitting of the susceptibility data of **1** to the Curie-Weiss law in the 50-300 K interval (red line represents the best fitting; R = 99.9%).

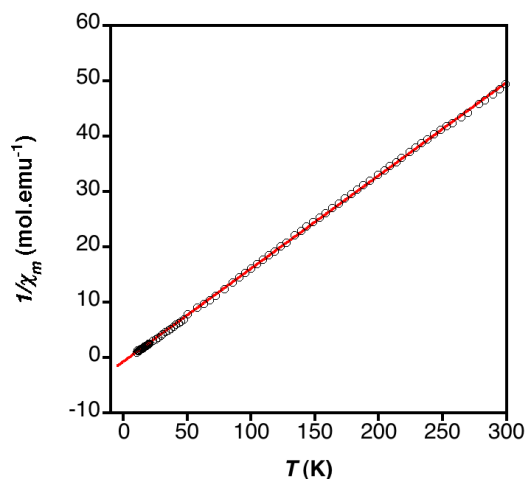

**SI 4.** Best fitting of the susceptibility data of **2** to the Curie-Weiss law in the 50-300 K interval (red line represents the best fitting; R = 99.9%).

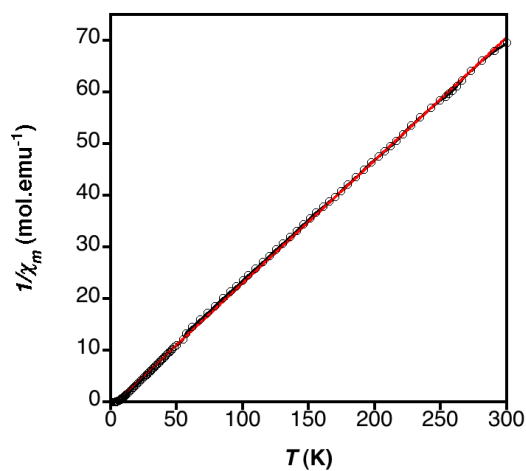

**SI 5.** Hysteresis loops of **2** at 2 K (*left*). Magnification at low fields (*right*). Solid lines are only a guide to the eye.

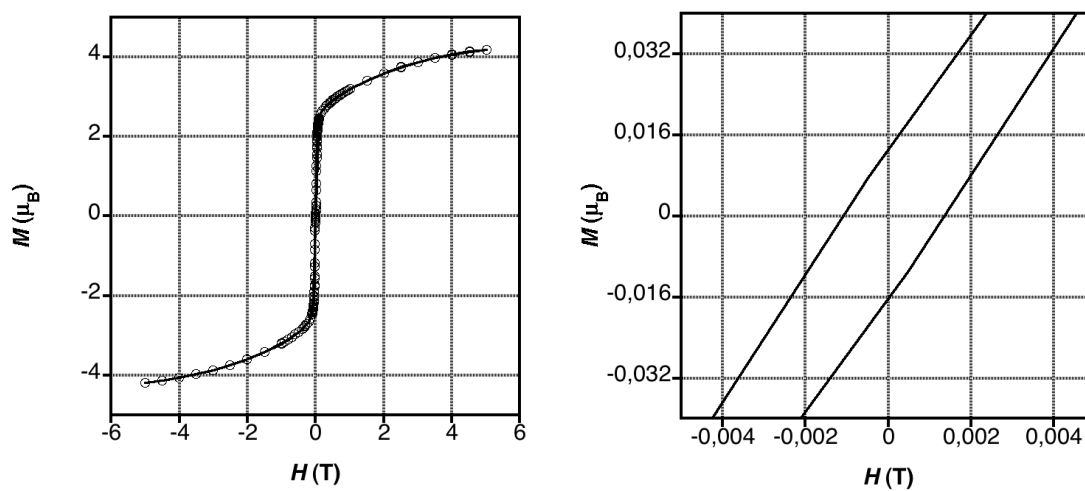

**SI 6.** *Left:* Best fitting (red line;  $R = 99.9\%$ ) of the susceptibility data of **3** to a Curie-Weiss law in the 150-300 K interval. *Right:* Field-cooled (black symbols) and zero field-cooled (red symbols) magnetizations under an external applied field of 50 G. Solid lines are only a guide to the eye.

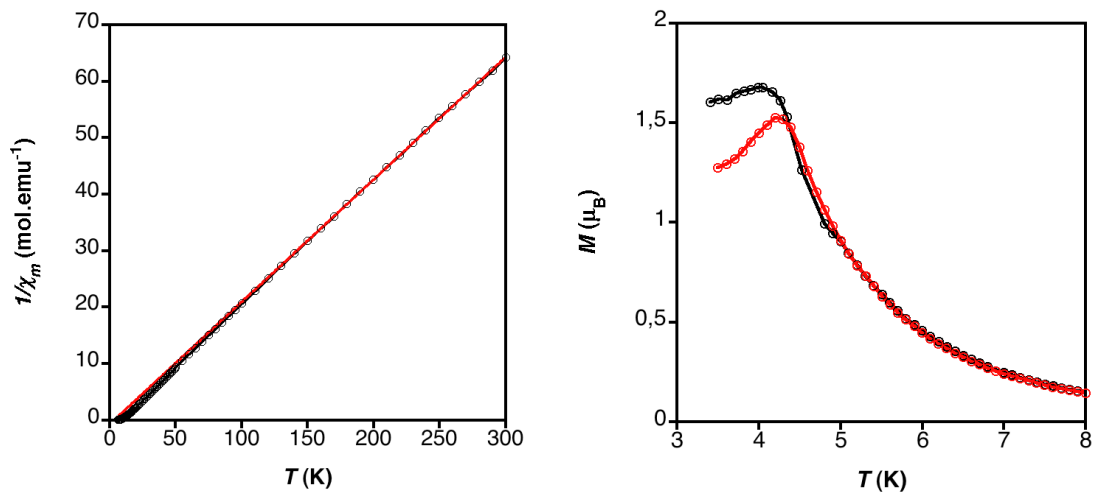

**SI 7.** Hysteresis loops of **3** at 2 K.

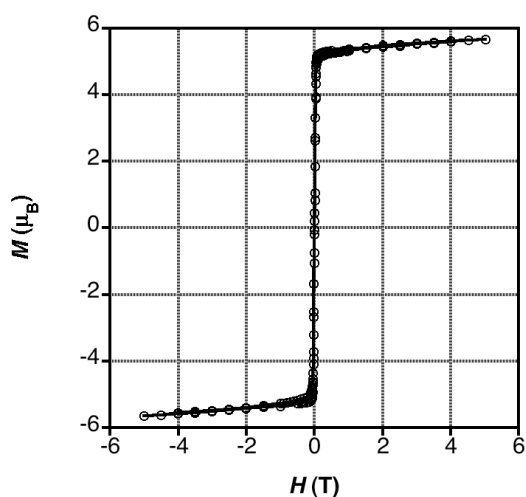

**SI 8.** *Left:* Best fitting (red line;  $R = 99.7\%$ ) of the susceptibility data of **4** to a Curie-Weiss law in the 150-300 K interval. *Right:* Field-cooled (black symbols) and zero field-cooled (red symbols) magnetizations under an external applied field of 50 G. Solid lines are only a guide to the eye.

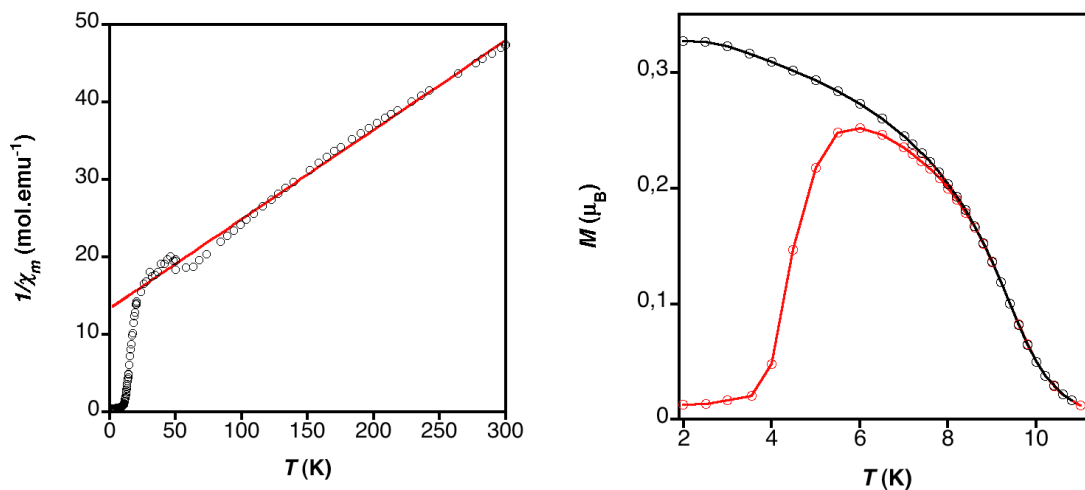

**SI 9.** Field dependence of the magnetization (*left*) and hysteresis loop of **4** at 2K (*right*).

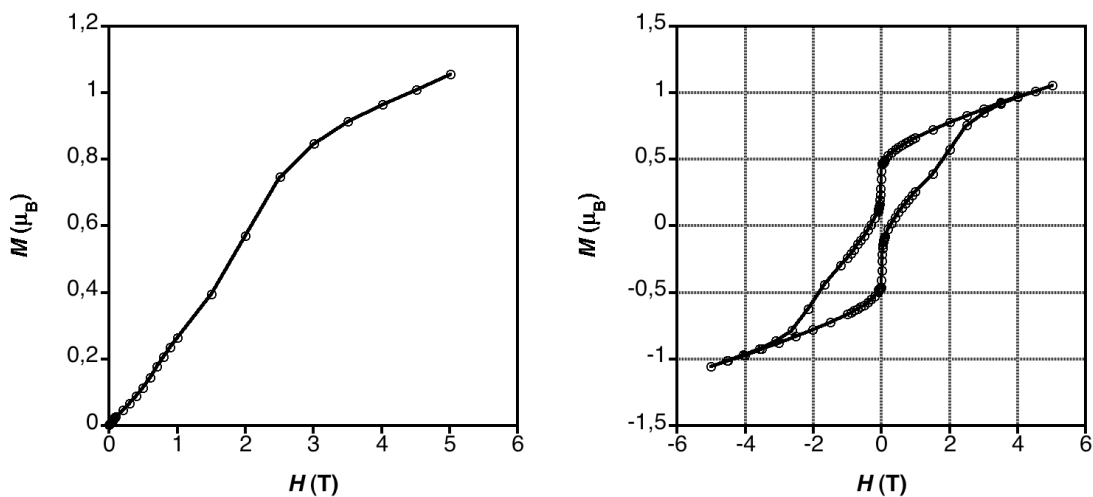

**SI 10.** Best fitting (red line;  $R = 99.5\%$ ) of the susceptibility data of **4** to a Curie-Weiss law in the 150-300 K interval.

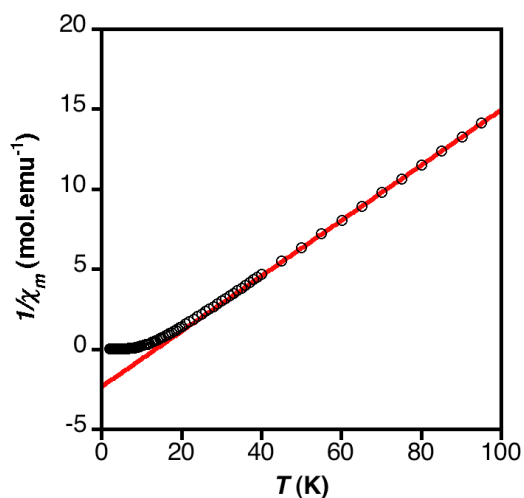

**SI 11.** Field-cooled (black symbols) and zero field-cooled (red symbols) magnetizations of **5** under an external applied field of 25 G (*left*). Field dependence of the isothermal magnetization at 2 K (*right*). Solid lines are only a guide to the eye.

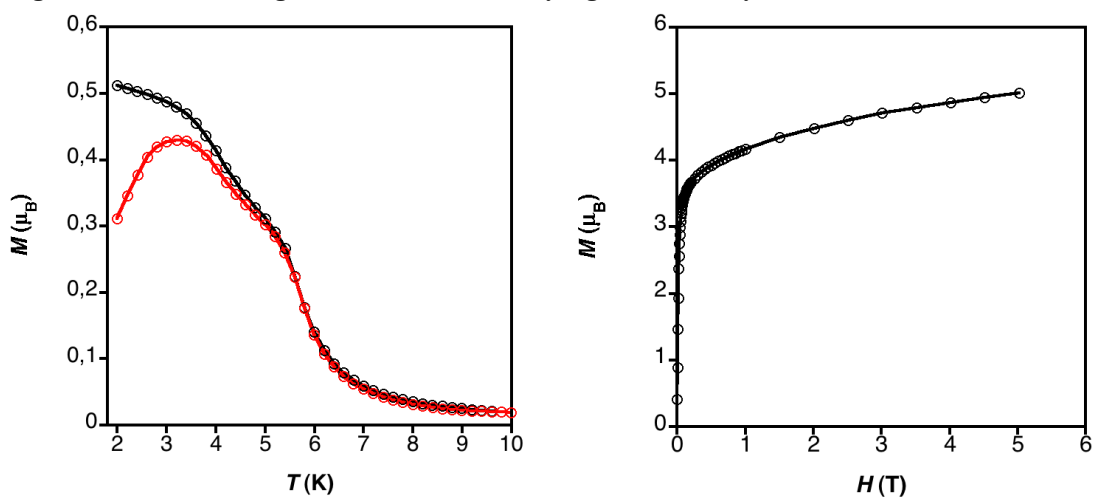

**SI 12.** Hysteresis loops at 2 K (*left*) and its magnification at low fields (*right*) for **5**. Solid lines are only a guide to the eye.

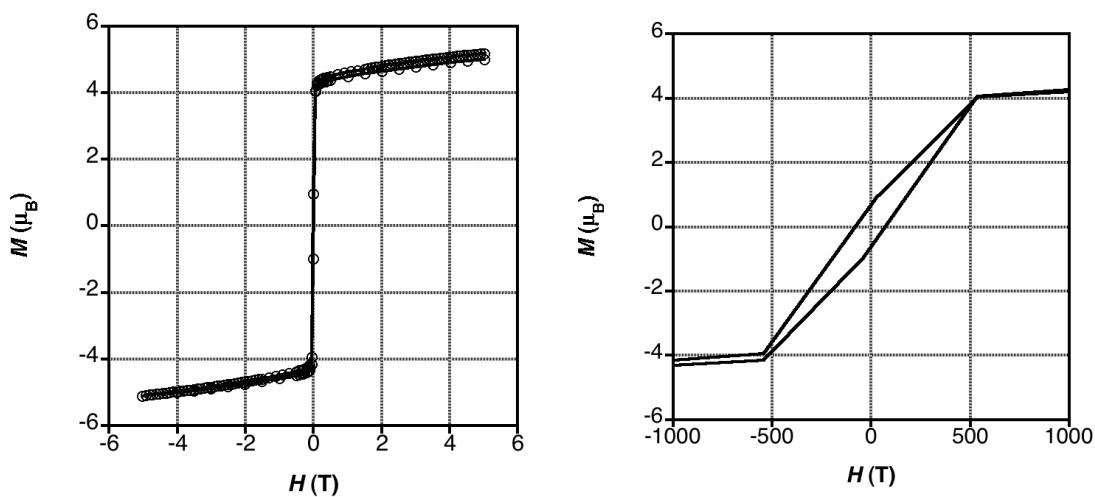

**SI 13.** Plot of  $\ln(\chi_M' T)$  vs.  $1/T$  for 5. Solid line represents the best fitting to a linear regime. AC data were measured at 1 Hz frequency, 3.95 G oscillating field and zero external field.

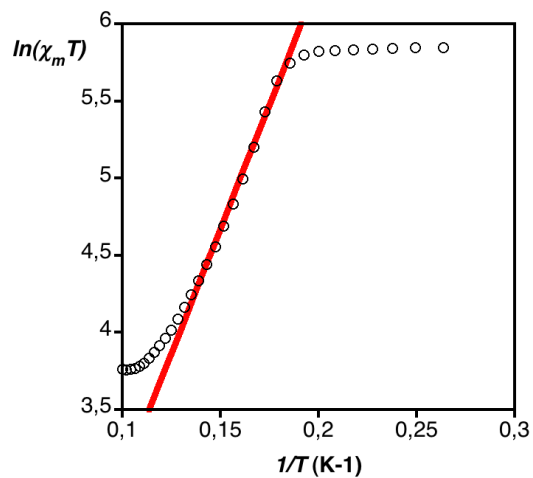

Supplement: b910490a.pdf [file b910490a.pdf]
